# Supplementary material for: Dark chocolate intake and cardiovascular diseases: a Mendelian randomization study
Source: PubMed Central journal article supplement (PMC10781976; doi:10.1038/s41598-023-50351-6), 2024-01-10
Supplement: 41598_2023_50351_MOESM1_ESM.pdf [file 41598_2023_50351_MOESM1_ESM.pdf]

**Supplemental materials**

**Dark Chocolate Intake and Cardiovascular Diseases: A Mendelian Randomization Study**

**Author names:** Juntao Yang, Jiedong Zhou, Jie Yang, Haifei Lou, Bingjie Zhao, Jufang Chi, Weiliang Tang

**Corresponding author:** Weiliang Tang. Department of Cardiology, Shaoxing People's Hospital, Shaoxing, Zhejiang 312000, P. R. China; E-mail: twl-sxyz@163.com



Supplementary Table 1. Information of outcome data from the FinnGen consortium used in this study.

| Outcome                      | Data code           | Year | Ethnicity | Cases  | Controls | Number of SNPs | Disease definition        |                           |                  |
|------------------------------|---------------------|------|-----------|--------|----------|----------------|---------------------------|---------------------------|------------------|
|                              |                     |      |           |        |          |                | ICD-10                    | ICD-9                     | ICD-8            |
| DVT of lower extremities     | I9_PHLETHROMBDVTLOW | 2023 | Finnish   | 9,109  | 324,121  | 20,169,198     | I80.3#, I80.20#, I80.29#  | 4511A/4510A/4512A         | 4510             |
| Essential hypertension       | I9_HYPTENSESS       | 2023 | Finnish   | 92,462 | 265,626  | 20,169,845     | I10                       | 4039A/4019X               | 401/402/403/404  |
| Non-rheumatic valve diseases | I9_NONRHEVALV       | 2023 | Finnish   | 20,772 | 286,109  | 20,168,219     | I34, I35, I36, I37        | 424                       | 39[4-6]/424, *   |
| Non-ischemic cardiomyopathy  | I9_NONISCHCARDMYOP  | 2023 | Finnish   | 9,926  | 303,607  | 20,168,549     | -                         | -                         | -                |
| Transient ischemic attack    | I9_TIA              | 2023 | Finnish   | 18,398 | 342,294  | 20,169,914     | G45, §                    | 435                       | 435              |
| Venous thromboembolism       | I9_VTE              | 2023 | Finnish   | 19,372 | 357,905  | 20,170,236     | I26, I80, O87.1, O88.2, † | 415/451/6713/6714/6732, ‡ | 450/451/671/6739 |
| Myocardial infarction        | I9_MI_STRICT        | 2023 | Finnish   | 24,185 | 313,400  | 20,169,327     | I21, I22, £               | 410                       | 410              |

DVT, deep venous thrombosis; SNPs, single nucleotide polymorphisms; ICD, International Classification of Disease.

\*Exclude 4249, 3940, 3950, 3960 and 3970. §Exclude G45.4. †Exclude I80.0#. ‡Exclude 4510. £Exclude I21.90, I21.97, I22.90, I22.97.



Supplementary Table 2. Information of other outcome data used in this study.

| Outcomes               | Year | Ethnicity            | Consortium | Cases   | Controls  | Number of SNPs |
|------------------------|------|----------------------|------------|---------|-----------|----------------|
| Coronary heart disease | 2022 | Over 95% of European | -          | 181,522 | 1,165,690 | 20,073,070     |
| Atrial fibrillation    | 2018 | European             | AFGen      | 60,620  | 970,216   | 33,519,037     |
| Heart failure          | 2020 | European             | HERMES     | 47,309  | 930,014   | 7,773,021      |
| Stroke                 | 2018 | European             | MEGASTROKE | 40,585  | 406,111   | 7,633,440      |
| Ischemic stroke        | 2018 | European             | MEGASTROKE | 34,217  | 406,111   | 8,296,492      |

SNPs, single nucleotide polymorphisms.



Supplementary Table 3. The SNPs not included in the MR analysis for each outcome.

| Outcome                     | SNPs lost in outcome data                                      | SNPs associated with confounders and outcomes | Palindromic SNPs          |
|-----------------------------|----------------------------------------------------------------|-----------------------------------------------|---------------------------|
| Coronary heart disease      | -                                                              | rs75633229                                    |                           |
| Atrial fibrillation         | -                                                              | rs75633229                                    |                           |
| Heart failure               | rs115832742, rs17143632, rs150993006, rs146635941, rs112868306 | rs75633229                                    |                           |
| Stroke                      | rs115832742, rs71469535, rs150993006, rs146635941, rs112868306 | rs75633229, rs145537395                       |                           |
| Ischemic stroke             | rs150993006                                                    | rs75633229, rs145537395                       |                           |
| Myocardial infarction       | rs5760827                                                      | rs75633229                                    | rs150993006,<br>rs7008560 |
| DVT of lower extremities    | rs5760827                                                      | rs112868306                                   |                           |
| Essential hypertension      | rs5760827                                                      | rs112868306                                   |                           |
| Non-rheumatic valve disease | rs5760827                                                      | rs75633229                                    |                           |
| Non-ischemic cardiomyopathy | rs5760827                                                      | -                                             |                           |
| Transient ischemic attack   | rs5760827                                                      | rs145537395, rs75633229                       |                           |
| Venous thromboembolism      | rs5760827                                                      | rs112868306                                   |                           |

SNPs, single-nucleotide polymorphisms; DVT, deep venous thrombosis.



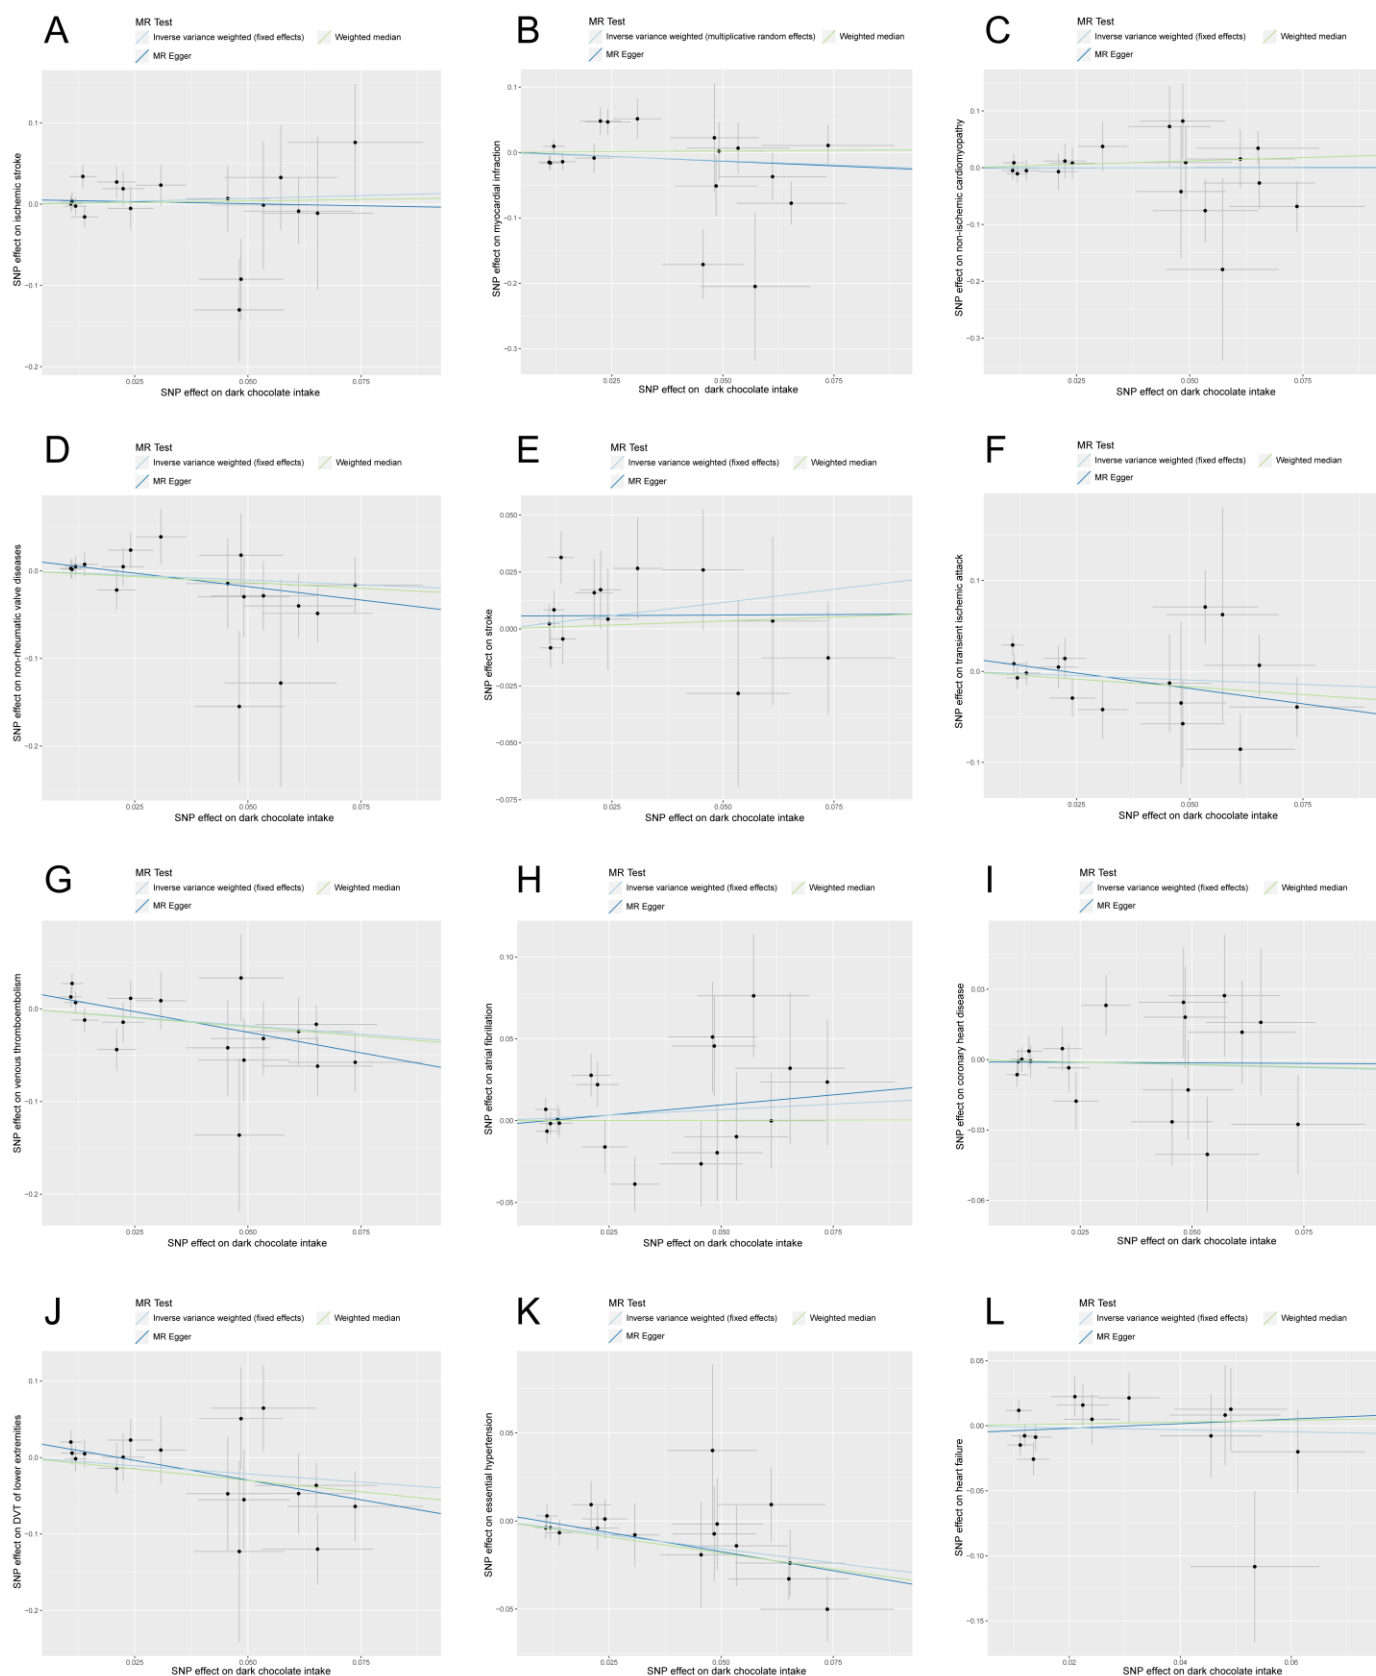

**Supplementary Figure 1.** Scatter plot for the association of dark chocolate intake with (A) ischemic stroke, (B) myocardial infarction, (C) non-ischemic cardiomyopathy, (D) non-rheumatic valve disease, (E) stroke, (F) transient ischemic attack, (G) venous thromboembolism, (H) atrial fibrillation, (I) coronary heart disease, (J) DVT of lower extremities, (K) essential hypertension and (L) heart failure.



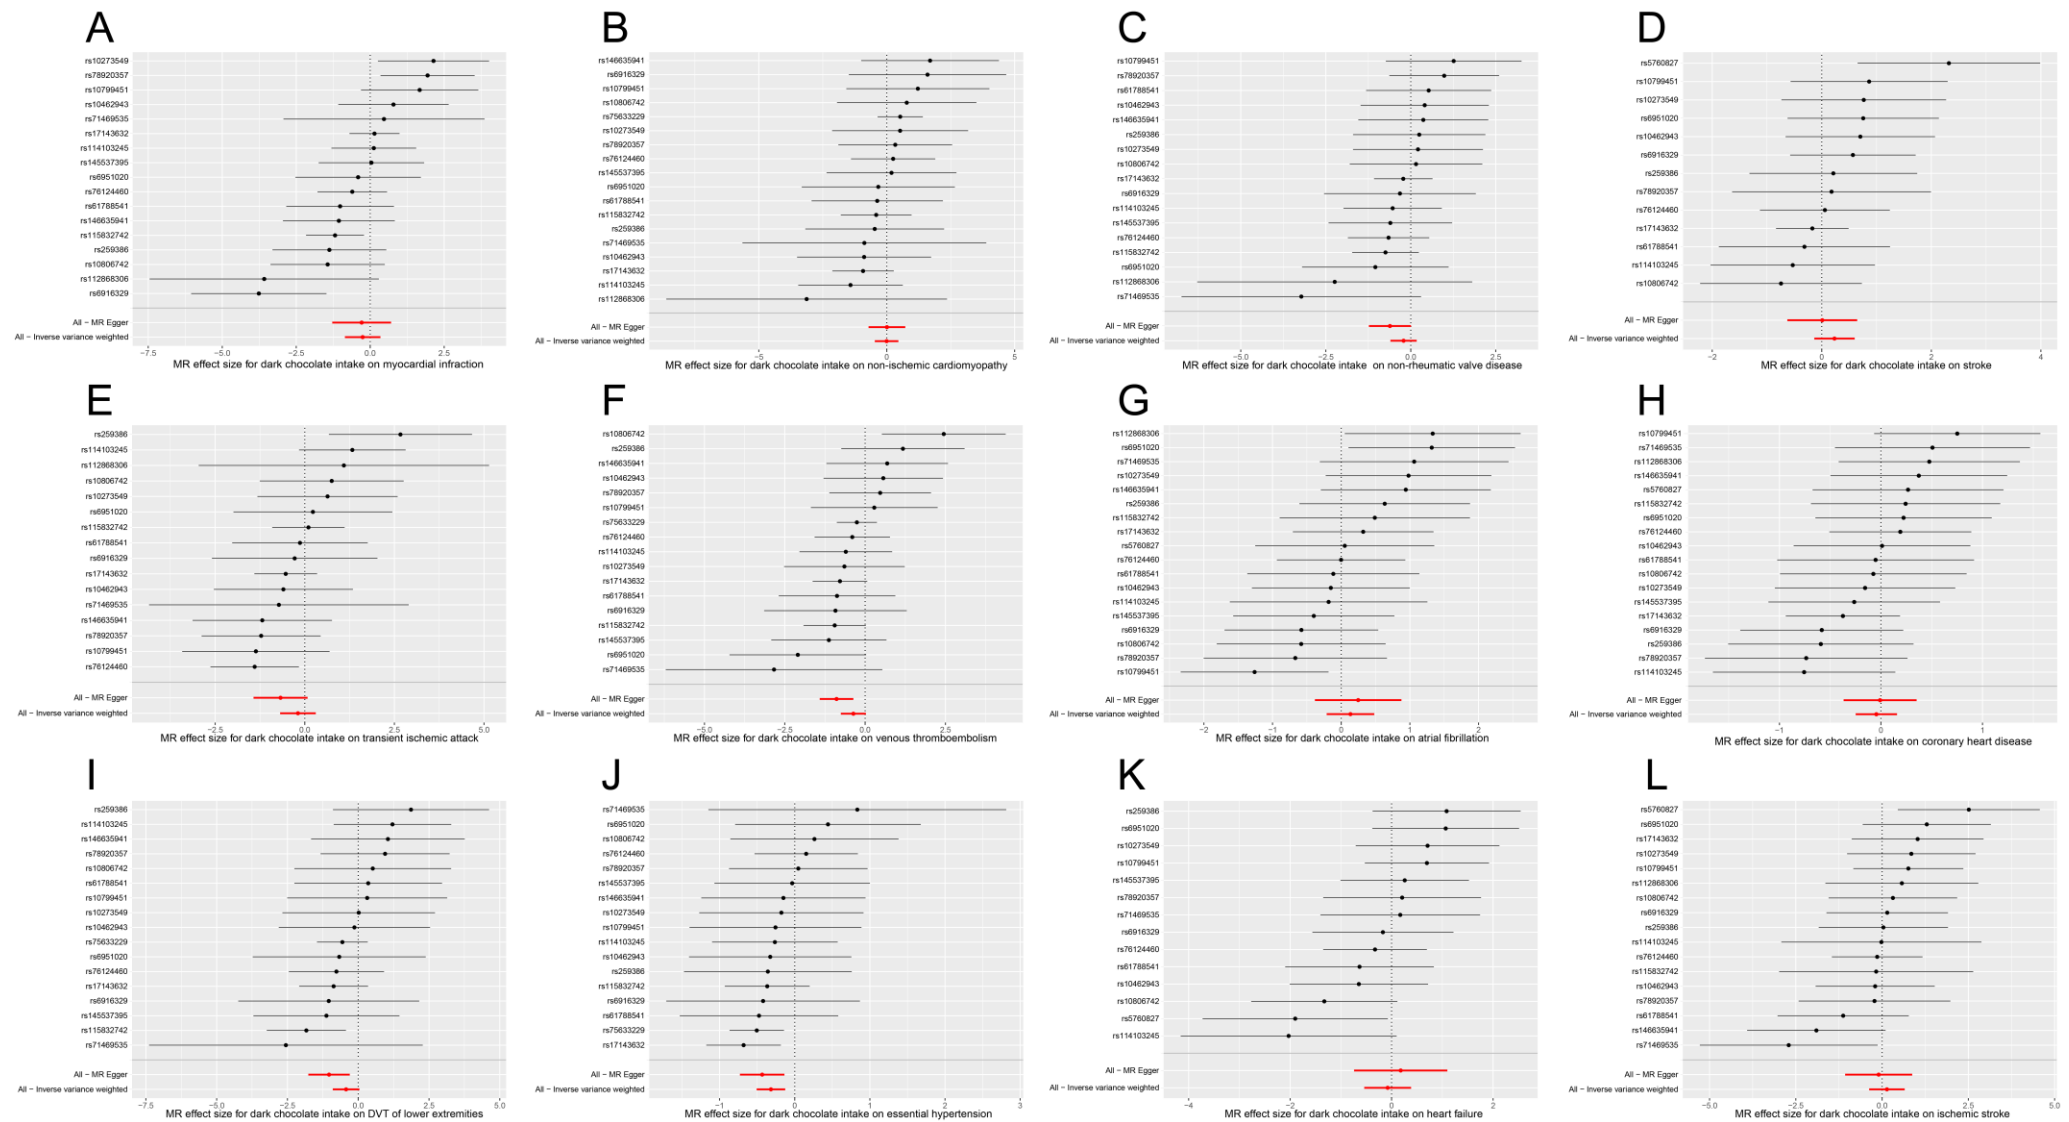

**Supplementary Figure 2.** Forest plot of individual SNPs for the association of dark chocolate intake with (A) myocardial infarction, (B) non-ischemic cardiomyopathy, (C) non-rheumatic valve disease, (D) stroke, (E) transient ischemic attack, (F) venous thromboembolism, (G) atrial fibrillation, (H) coronary heart disease, (I) DVT of lower extremities, (J) essential hypertension, (K) heart failure and (L) ischemic stroke.



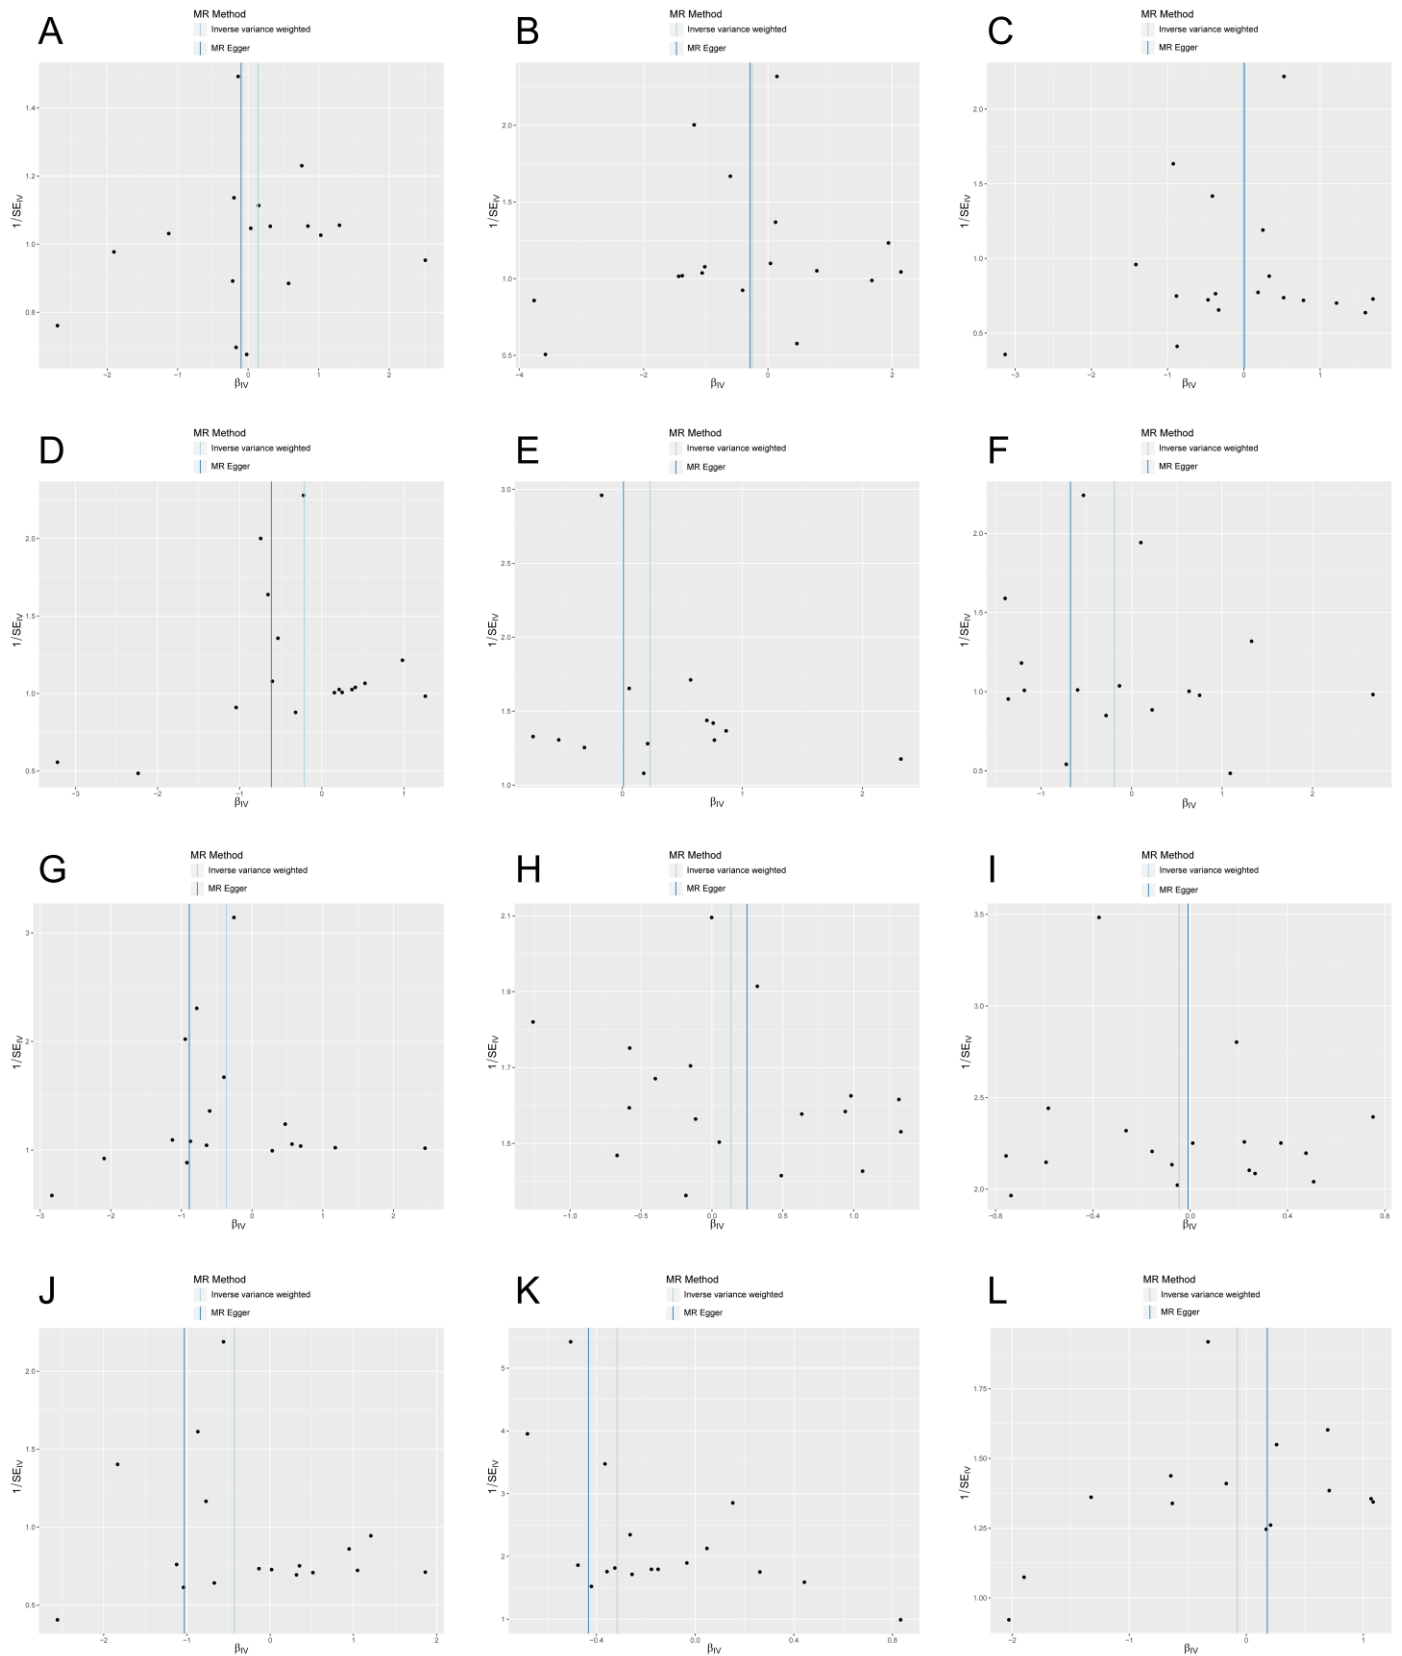

**Supplementary Figure 3.** Funnel plot for the association of dark chocolate intake with (A) ischemic stroke, (B) myocardial infarction, (C) non-ischemic cardiomyopathy, (D) non-rheumatic valve disease, (E) stroke, (F) transient ischemic attack, (G) venous thromboembolism, (H) atrial fibrillation, (I) coronary heart disease, (J) DVT of lower extremities, (K) essential hypertension and (L) heart failure.



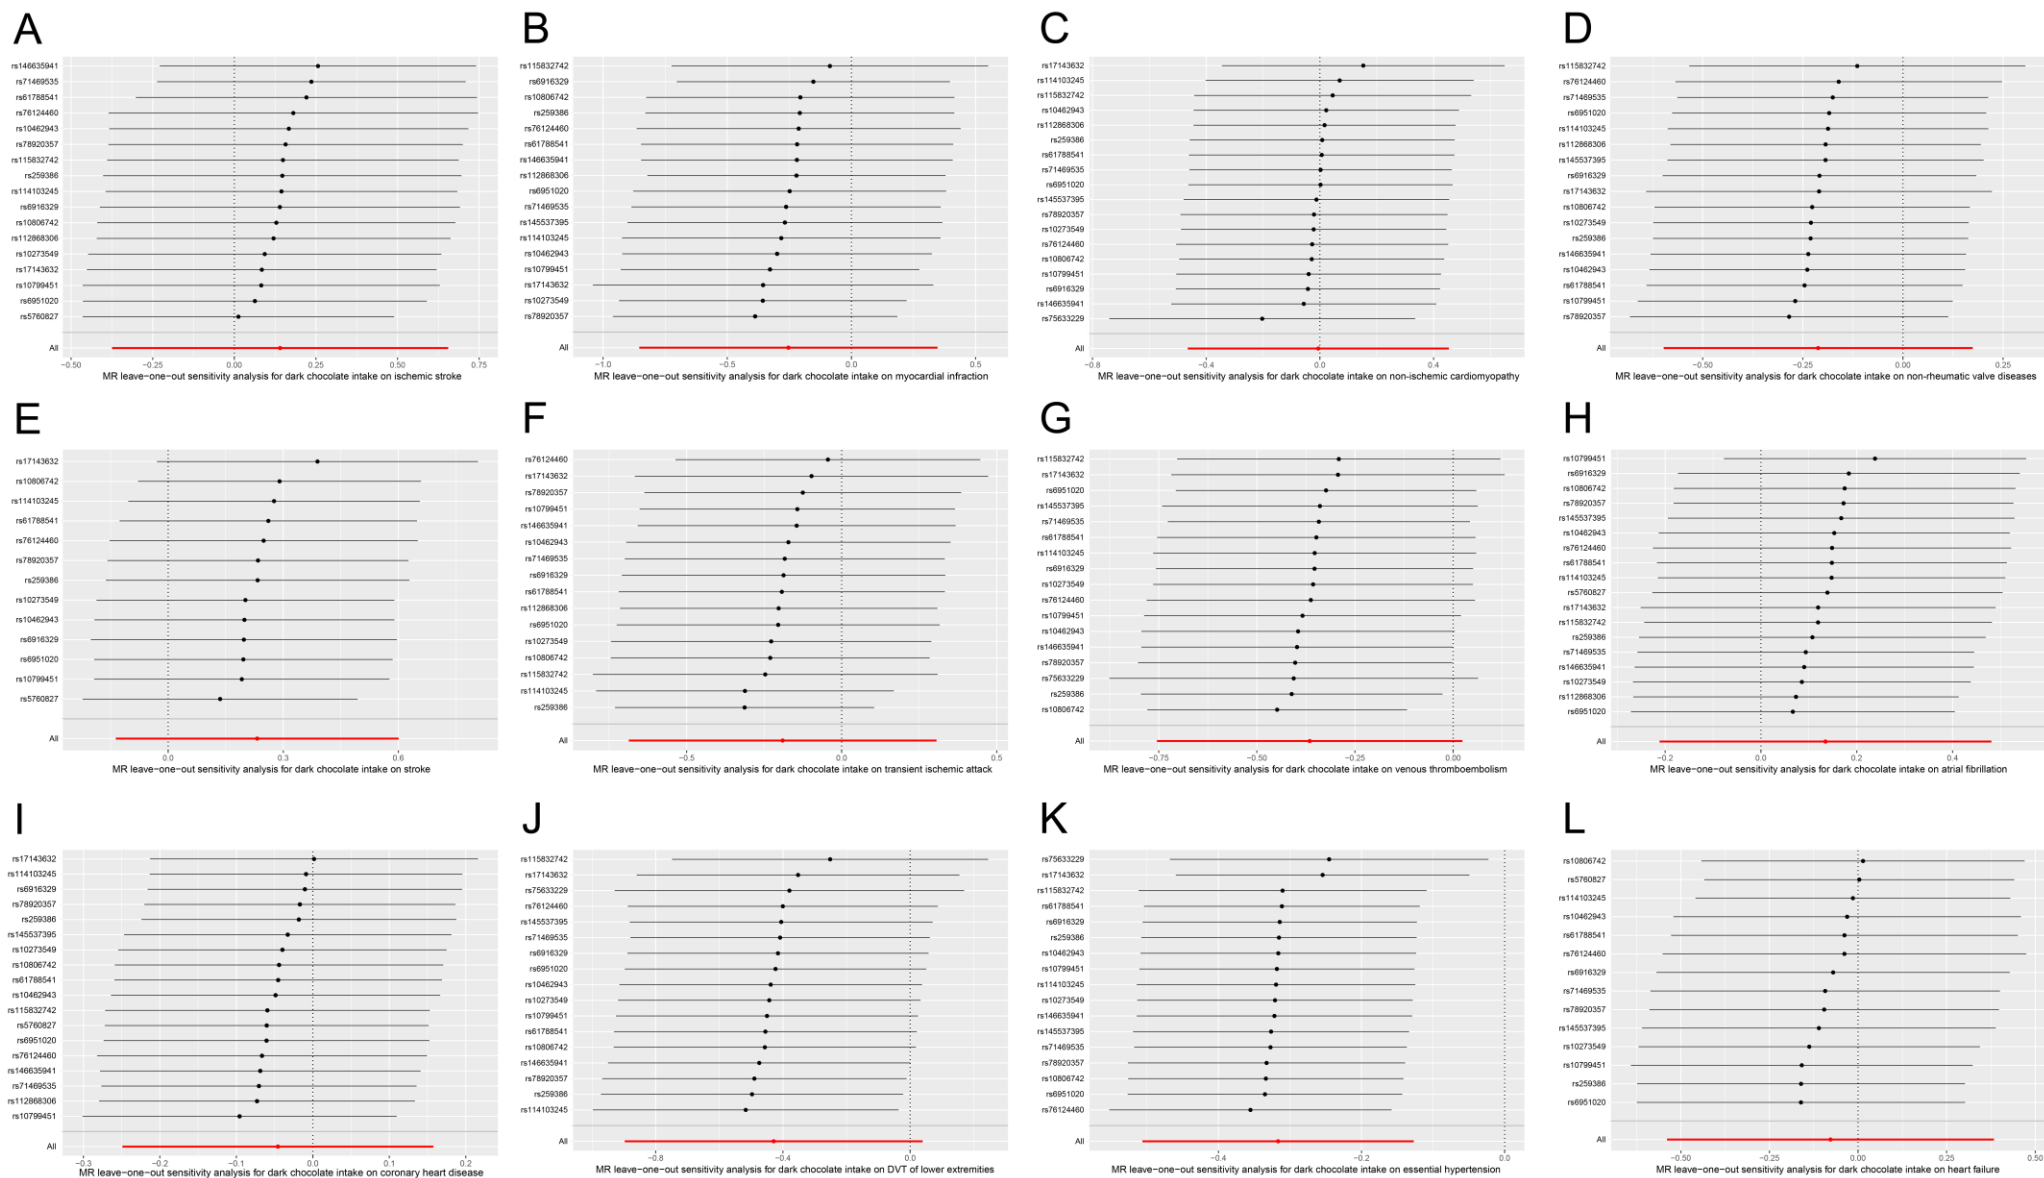

**Supplementary Figure 4.** Leave-one-out sensitivity analysis for the association of dark chocolate intake with (A) ischemic stroke, (B) myocardial infarction, (C) non-ischemic cardiomyopathy, (D) non-rheumatic valve disease, (E) stroke, (F) transient ischemic attack, (G) venous thromboembolism, (H) atrial fibrillation, (I) coronary heart disease, (J) DVT of lower extremities, (K) essential hypertension and (L) heart failure.
